# Supplementary material
Source: PubMed Central journal article supplement (PMC9126033)
Supplement: NIHMS1797469-supplement-Suppl_Materials.pdf [file NIHMS1797469-supplement-Suppl_Materials.pdf]

## Supplementary Materials for

### Effective combination immunotherapy using oncolytic viruses to deliver CAR targets to solid tumors

Anthony K. Park, Yuman Fong, Sang-In Kim, Jason Yang, John P. Murad, Jianming Lu, Brook Jeang, Wen-Chung Chang,  
Nanhai G. Chen, Sandra H. Thomas, Stephen J. Forman, Saul J. Priceman\*

\*Corresponding author. Email: spriceman@coh.org

Published 2 September 2020, *Sci. Transl. Med.* **12**, eaaz1863 (2020)  
DOI: 10.1126/scitranslmed.aaz1863

#### The PDF file includes:

- Fig. S1. Replacing *tk* gene with hCD19t in OV does not significantly affect the infection efficiency or cell killing of MDA-MB-468.
- Fig. S2. Activation of CD19-CAR T cells against OV19t-infected tumor cells expressing CD19t.
- Fig. S3. CD19-CAR T cells activate and kill MDA-MB-231 cells infected with OV19t.
- Fig. S4. OV19t-mediated expression of CD19t in tumor cells promotes tumor cell-targeted cytotoxicity of CD19-CAR T cells in vitro.
- Fig. S5. OV carrying *tk* does not induce CD19-CAR T cell activity.
- Fig. S6. Representative fluorescence-activated cell sorting plots of CD19t<sup>+</sup> MDA-MB-468 cells from harvested tumors (related to Fig. 3A).
- Fig. S7. Murine CD19-CAR T cells.
- Fig. S8. Specificity of combination therapy in the murine MC38 tumor model.
- Fig. S9. Assessment of OVm19t tumor selectivity.
- Fig. S10. Schematic of combination therapy concept using OV to introduce CAR targets to solid tumors.

#### Other Supplementary Material for this manuscript includes the following:

(available at [stm.sciencemag.org/cgi/content/full/12/559/eaaz1863/DC1](http://stm.sciencemag.org/cgi/content/full/12/559/eaaz1863/DC1))

Data file S1 (Microsoft Excel format). Primary data.

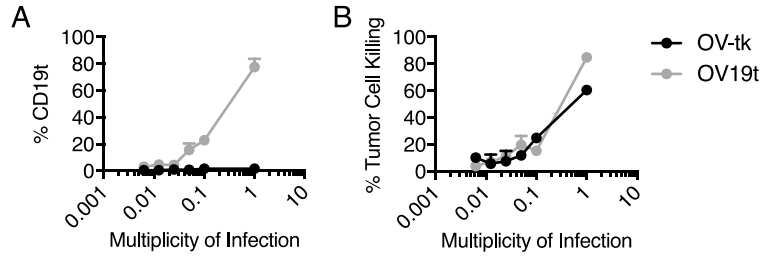

**Fig. S1. Replacing *tk* gene with hCD19t in OV does not significantly affect the infection efficiency or cell killing of MDA-MB-468.** A) Quantification of cell surface CD19t expression following 24 h co-culture with indicated MOIs of OV-*tk* (control) or OV19t. B) Tumor killing assessed by flow cytometry comparing MDA-MB-468 treated with indicated MOIs of OV-*tk* (control) or OV19t. Data presented are from duplicate wells and shown as mean + SD.

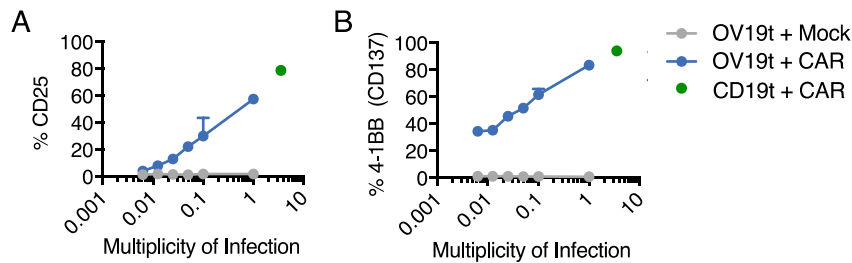

**Fig. S2. Activation of CD19-CAR T cells against OV19t-infected tumor cells expressing CD19t.** Quantification of A) CD25 and B) CD137 expression on untransduced T cells (Mock) or CD19-CAR T cells following a 24 h co-culture with tumor cells at an E:T ratio of 1:2 with or without addition of indicated MOI of OV19t. Green dots indicate T cells co-cultured with MDA-MB-468 cells stably expressing CD19t.

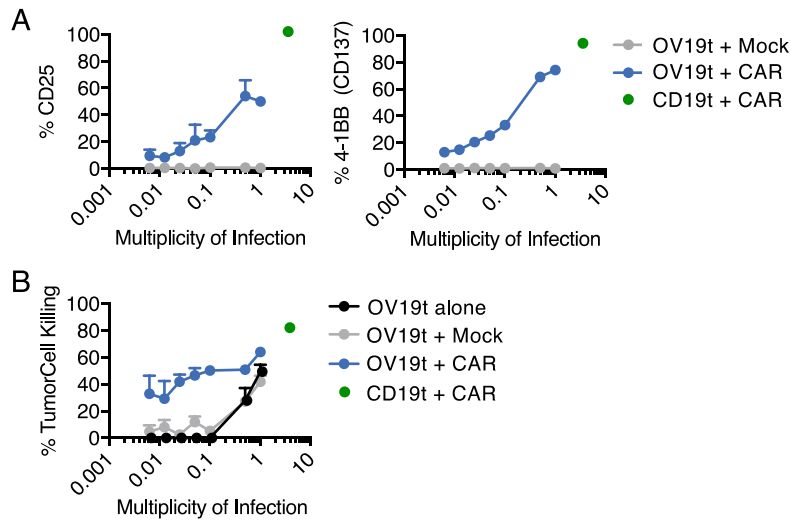

**Fig. S3. CD19-CAR T cells activate and kill MDA-MB-231 cells infected with OV19t.** A) Quantification of CD25 (left) and CD137 (right) expression on Mock or CD19-CAR T cells following a 24 h co-culture with MDA-MB-231 cells at an E:T ratio of 1:2 with or without addition of indicated MOI of OV19t. B) Tumor cell killing as assessed by flow cytometry comparing the effect of Mock T cells or CD19-CAR T cells on following 24 h co-culture with MDA-MB-231 cells treated with indicated MOIs of OV19t. Green dots indicate T cells co-cultured with MDA-MB-231 cells lentivirally transduced to stably express CD19t.

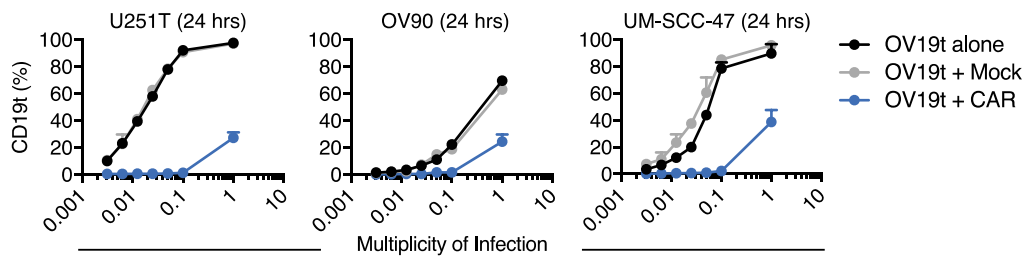

**Fig. S4. OV19t-mediated expression of CD19t in tumor cells promotes tumor cell-targeted cytotoxicity of CD19-CAR T cells in vitro.** Percent of CD19t positive U251T, OV90, or UM-SCC-47 cells exposed to the indicated MOIs of OV19t and cocultured for 24 h with Mock T cells or CD19-CAR T cells. Data presented are from duplicate wells and shown as mean + SD.

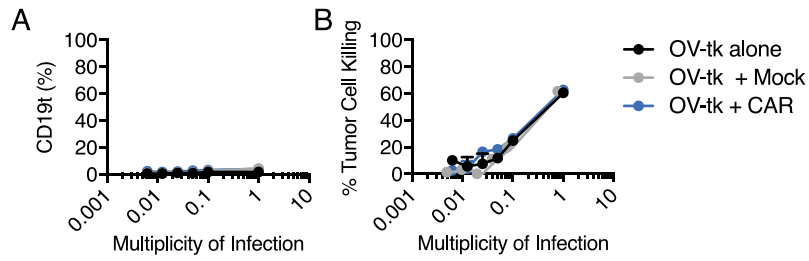

**Fig. S5. OV carrying *tk* does not induce CD19-CAR T cell activity.** (A) Quantification of percent of MDA-MB-468 cells positive for cell surface CD19t following 24 h coculture with indicated MOIs of OV-*tk* alone or with Mock T cells or CD19-CAR T cells. (B) Tumor cell killing of MDA-MB-468 treated with the indicated MOIs of OV-*tk* alone or with Mock T cells or CD19-CAR T cells. Viable cells were assessed by flow cytometry. Data presented are from duplicate wells and shown as mean + SD.

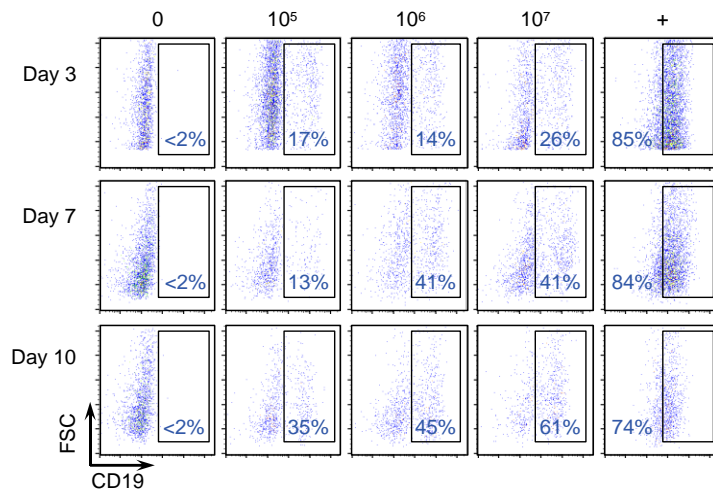

**Fig. S6. Representative fluorescence-activated cell sorting plots of CD19t<sup>+</sup> MDA-MB-468 cells from harvested tumors (related to Fig. 3A).** Representative FACS plots show percent of CD19t-positive viable EpCAM<sup>+</sup> MDA-MB-468 tumor cells from harvested tumors at indicated timepoints and from mice treated by intratumoral injection with the indicated pfu of OV19t. Cells from harvested CD19t lentivirus stably-transduced tumors are indicated as '+'. Values indicate percent of cells in the boxed region.

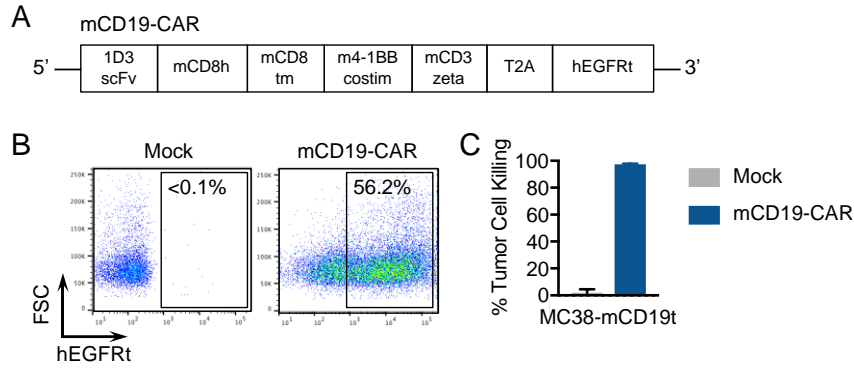

**Fig. S7. Murine CD19-CAR T cells.** (A) Diagram of the retroviral expression cassette with mCD19-CARs containing the murine scFv (1D3 clone) targeting CD19, a murine CD8 hinge and transmembrane domain, a murine cytoplasmic 4-1BB costimulatory domain, and a murine CD3 $\zeta$  cytolytic domain. A human truncated, nonsignaling EGFR (hEGFRt), separated from the CAR with a T2A ribosomal skip sequence, was expressed for tracking CAR-expressing cells. (B) Representative FACS plots of cells with mCD19-CAR (detected by hEGFRt positivity) on the surface of ex vivo engineered murine T cells. (C) Tumor cell killing ability of mCD19-CAR T cells. Untransduced murine T cells (Mock) or mCD19-CAR T cells were cocultured for 24 h co-culture with MC38 tumor cells lentivirally-transduced to stably express murine CD19t (MC38-mCD19t). The ratio of T cells to tumor cells was 1:1. Tumor cell killing is compared to tumor cells cultured alone. Data presented are from duplicate wells and shown as mean + SD.

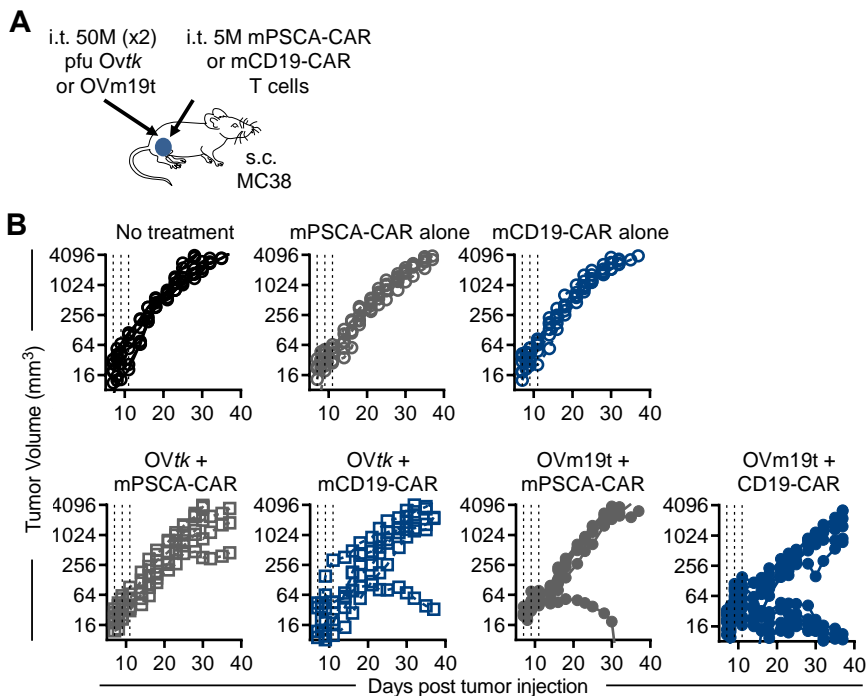

**Fig. S8. Specificity of combination therapy in the murine MC38 tumor model.** (A) Schematic of MC38 tumor-bearing mice treated with *Ovtk* or OVm19t in combination with either mPSCA-CAR or mCD19-CAR T cells. Mice were intratumorally treated with  $5 \times 10^7$  pfu of either *Ovtk* or OVm19t on days 7 and 9. On day 11, mice were intratumorally treated with either mPSCA-CAR or mCD19-CAR T cells ( $5 \times 10^6$  cells). (B) Tumor volume ( $\text{mm}^3$ ) was measured with calipers. Data for each mouse per group is shown,  $n \geq 6$  per group. Dashed vertical lines indicate intratumoral injections.

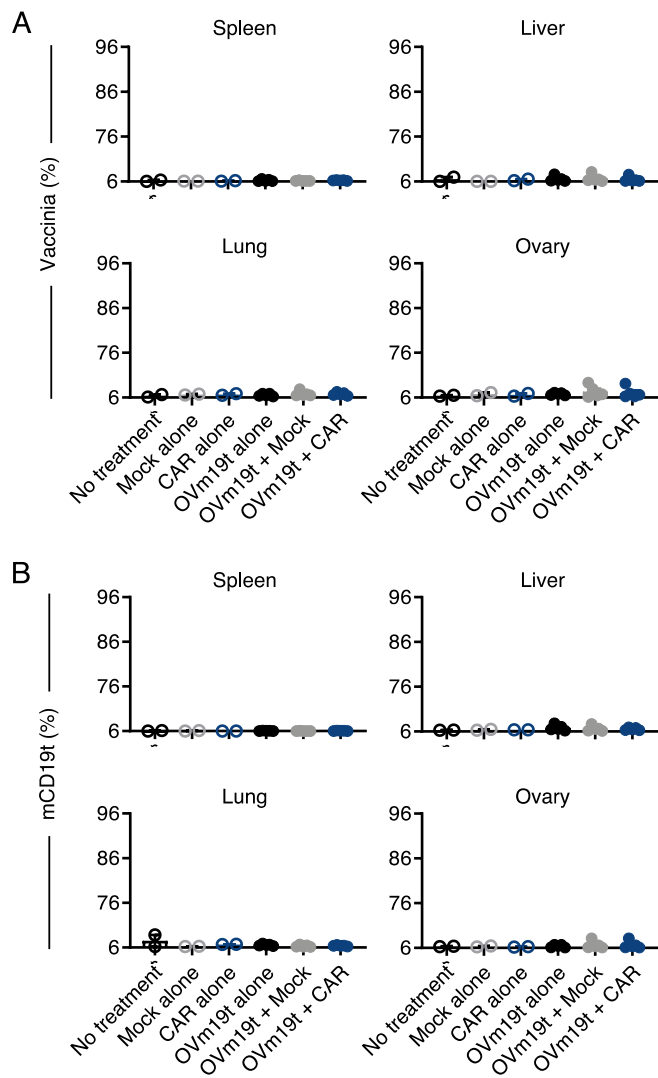

**Fig. S9. Assessment of OVm19t tumor selectivity.** Mice were subcutaneously engrafted with MC38 ( $5 \times 10^5$ ) cells and at days 14 and 16 mice were intratumorally treated with  $5 \times 10^7$  pfu per mouse. On day 18 mice were treated intravenously (i.v.) with untransduced T cells (Mock) or mCD19-CAR T cells. Spleen, liver, lung, and ovary were harvested 5 days after OVm19t and 3 days after T cell treatments for quantification of percent cells positive for vaccinia (A) or mCD19t (B) by flow cytometry. Tissues from 2 - 5 mice for each group were evaluated and data for each mouse is shown.

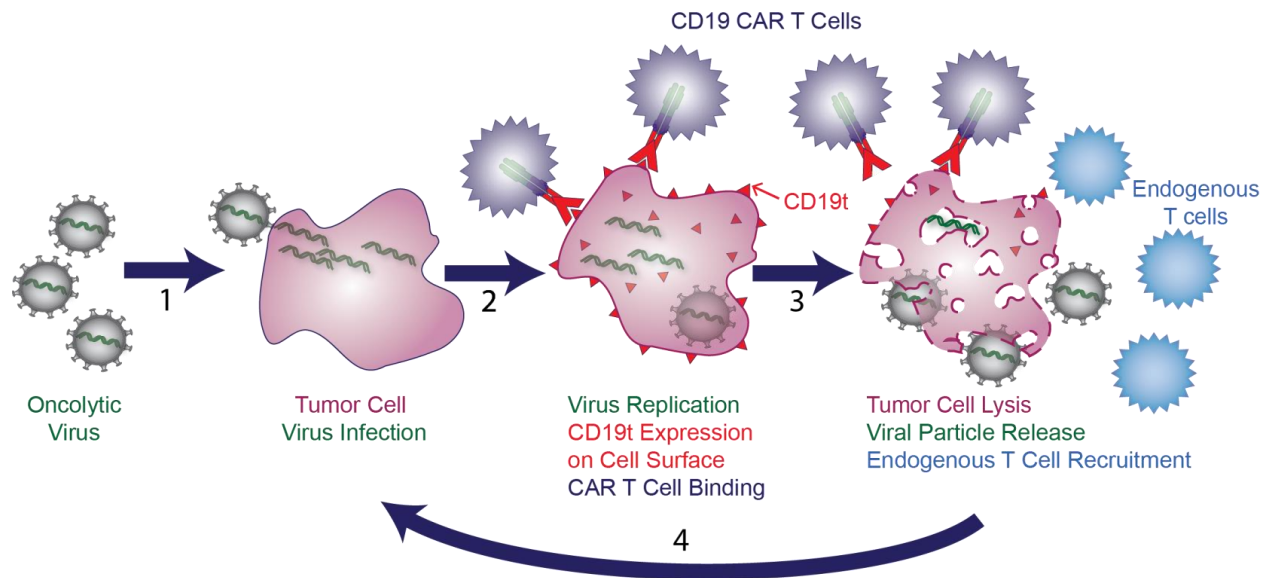

**Fig. S10. Schematic of combination therapy concept using OV to introduce CAR targets to solid tumors.** (1) Oncolytic virus (in this study, OV19t) infects tumor cells. (2) Virus replication and production of CD19t on the cell surface enables CD19-CAR T cell targeting. (3) Tumor cell lysis leads to viral particle release and the combination promotes endogenous immune cell recruitment to tumors. (4) Released viral particles re-initiate virus infection of surrounding tumor cells.
